# Supplementary material for: Genetic robustness control of auxin output in priming organ initiation
Source: PubMed Central journal article supplement — Proc Natl Acad Sci U S A. 2023 Jul 3;120(28):e2221606120. doi: 10.1073/pnas.2221606120 (PMC10334806; doi:10.1073/pnas.2221606120), 2023-07-03
Supplement: pnas.2221606120.sapp.pdf [file pnas.2221606120.sapp.pdf]

## Supporting Information for

### Genetic robustness control of auxin output in priming organ initiation

Yuqiu Dai<sup>1,3</sup>, Linjie Luo<sup>2,3</sup> and Zhong Zhao<sup>1,\*</sup>

<sup>1</sup>CAS Center for Excellence in Molecular Plant Sciences, MOE Key Laboratory for Cellular Dynamics, School of Life Sciences, Division of Life Sciences and Medicine, University of Science and Technology of China, Hefei, China.

<sup>2</sup>Anhui Provincial Key Laboratory of Molecular Enzymology and Mechanism of Major Diseases, Anhui Provincial Key Laboratory of the Conservation and Exploitation of Biological Resources, College of Life Sciences, Anhui Normal University, Wuhu 241000, China.

<sup>3</sup>These authors contributed equally.

\***Correspondence:** Zhong Zhao

**Email:** zhzhao@ustc.edu.cn (Z.Z.)

**This PDF file includes:**

**Figures S1 to S22**

**Table S1**

SUPPLEMENTAL FIGURES

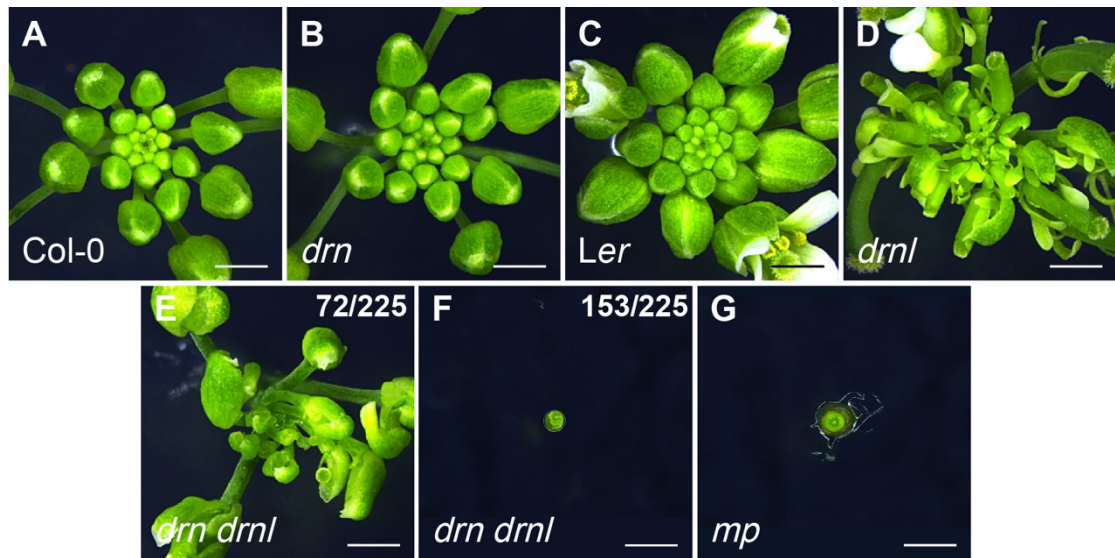

**Fig. S1. The *drn drnl* and *mp* mutants have severe defects in lateral organ initiation.** Top views of the inflorescences of six-week-old Col-0 (A), *drn* (B), Ler (C), *drnl* (D), *mp* (G) and *drn drnl* (E, F) plants. The number of *drn drnl* mutants with different phenotypes are indicated (E, F);  $n \geq 12$  shoot apices per genotype were observed with similar results. Scale bars, 1 mm.

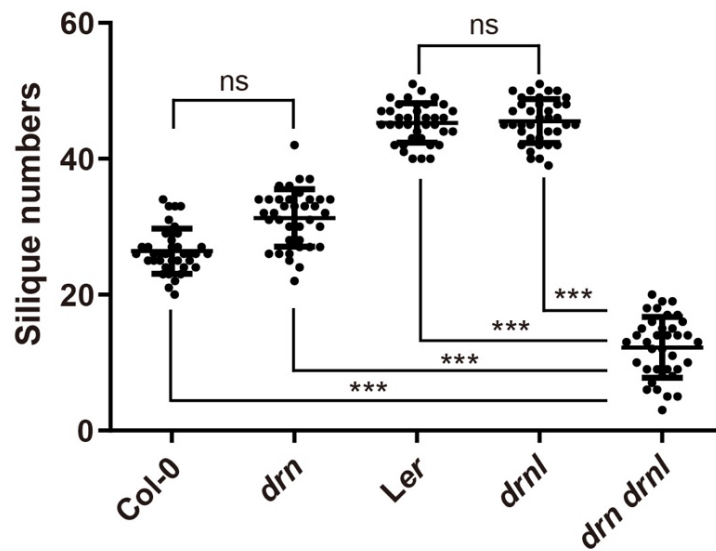

**Fig. S2. Measurement of silique numbers in *drn drnl* double mutants.** The silique numbers of the *drn* and *drnl* single mutants showed no difference from their respective wild-type plants (*drn* vs Col-0 and *drnl* vs Ler) but were significantly decreased in the *drn drnl* double mutant. N = 37 for each genotype, two-tailed Student's *t* tests, \*\*\*P < 0.001; ns, no significant difference. Six-week-old plants were used for the measurement.

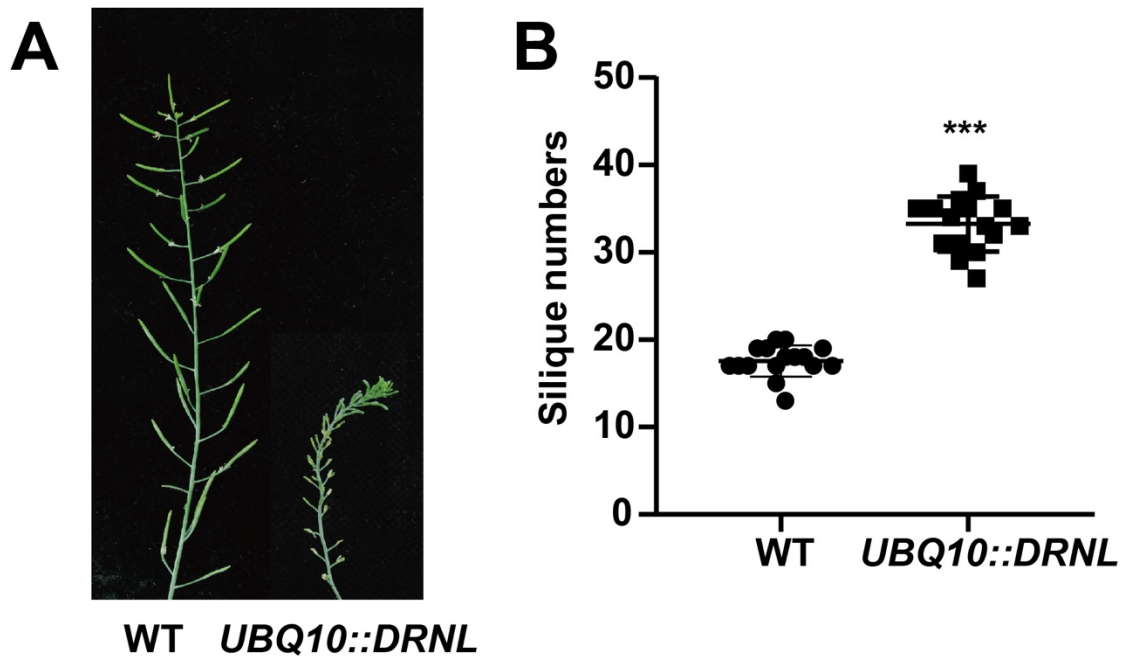

**Fig. S3. Overexpression of *DRNL* increased the number of siliques in the wild type. (A)** The inflorescences of six-week-old WT and *UBQ10::DRNL* plants. **(B)** Measurement of silique numbers in WT and *UBQ10::DRNL* plants. N = 17 for each genotype, two-tailed Student's *t* tests, \*\*\*P < 0.001.

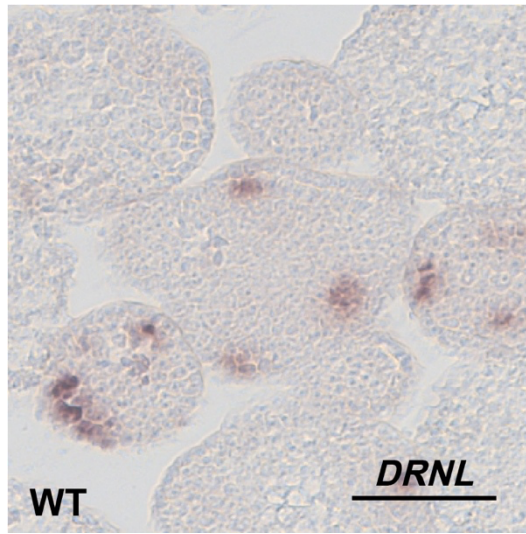

**Fig. S4. Top view of *DRNL* expression patterns in the SAM.** *DRNL* expression was detected in the inflorescences of wild-type plants by RNA *in situ* hybridization.  $n \geq 13$  shoot apices were observed with similar results. Scale bars, 50  $\mu\text{m}$ .

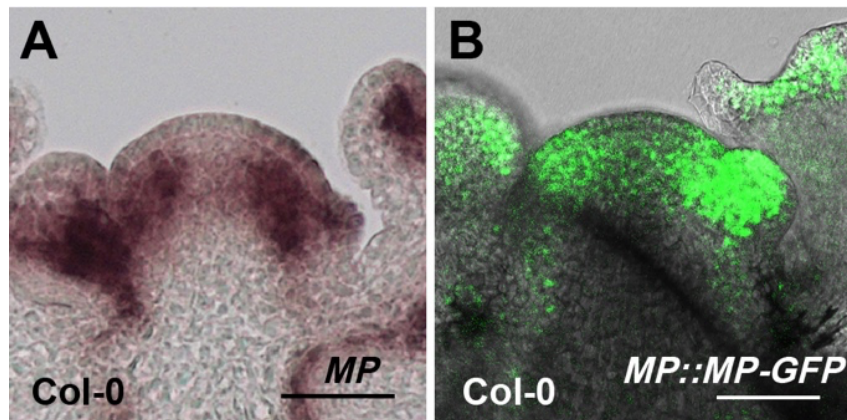

**Fig. S5. *MP* distribution patterns in the SAM.** (A) *MP* transcripts were detected by RNA *in situ* hybridization; n = 10 shoot apices were observed with similar results. Scale bars, 50  $\mu$ m. (B) *MP* protein distribution patterns in *MP::MP-GFP/mp* rescued plants. n = 29 shoot apices were observed with similar results. Scale bars, 50  $\mu$ m.

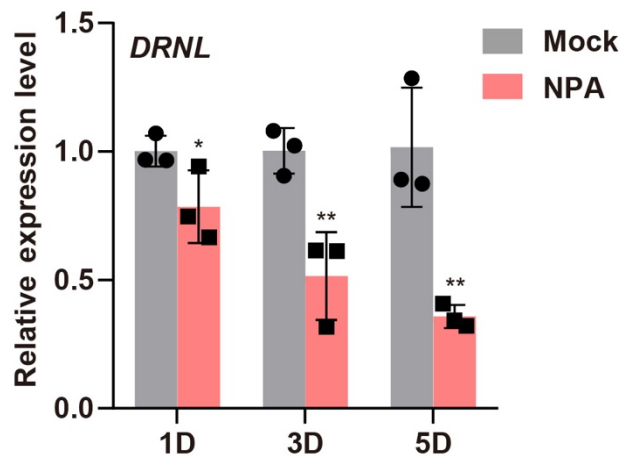

**Fig. S6. The expression levels of *DRNL* with NPA treatment.** Detection of *DRNL* expression levels in the SAM under NPA treatment after 1 day (1D), 3 days (3D) and 5 days (5D) using qRT-PCR. The data are shown as the mean  $\pm$  s.d. ; n = 3 biological replicates, two-tailed Student's *t* tests, \*P < 0.05, \*\*P < 0.01.

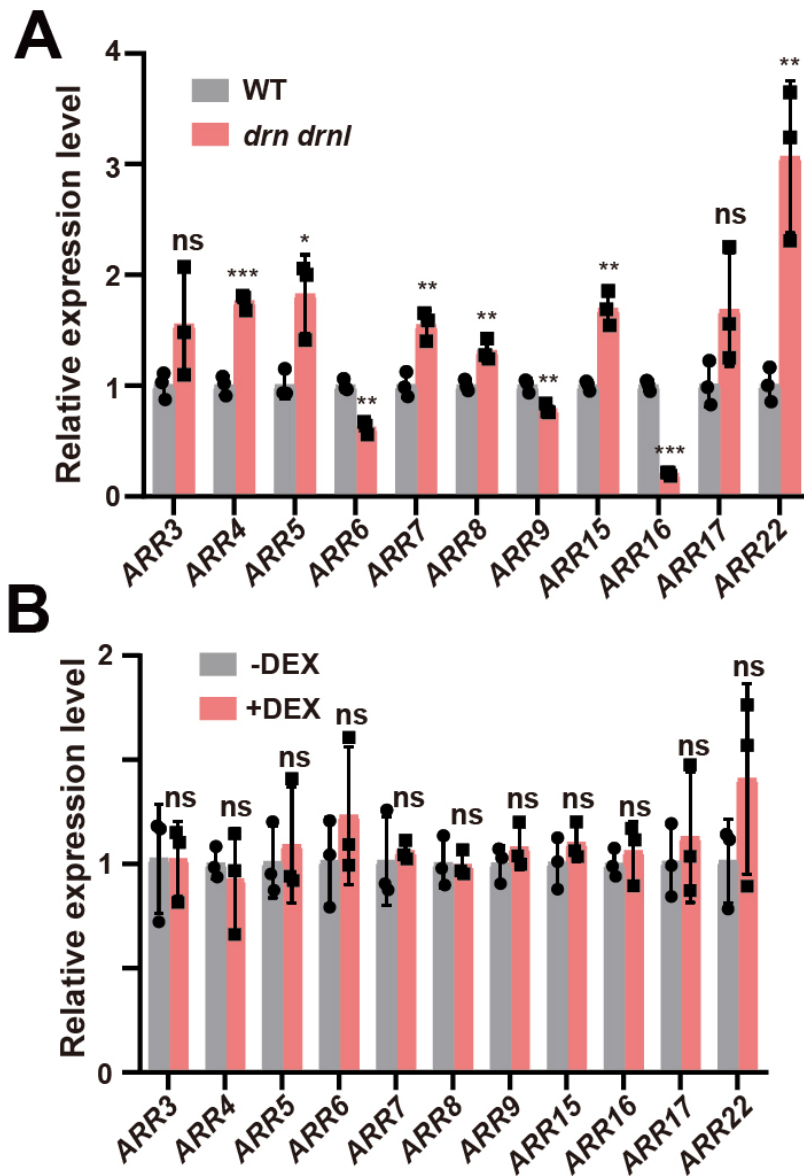

**Fig. S7. A-type ARR**s were not under direct control by DRNL. Expression levels of A-type ARR*s* in *drn drnl* double mutants (A) and *UBQ10::DRNL-GR* inflorescences with DEX induction in the presence of cycloheximide (B) were measured by qRT-PCR. The data are shown as the mean  $\pm$  s.d. ;  $n = 3$  biological replicates, two-tailed Student's *t* tests, \* $P < 0.05$ , \*\* $P < 0.01$ , \*\*\* $P < 0.001$ ; ns, no significant difference.



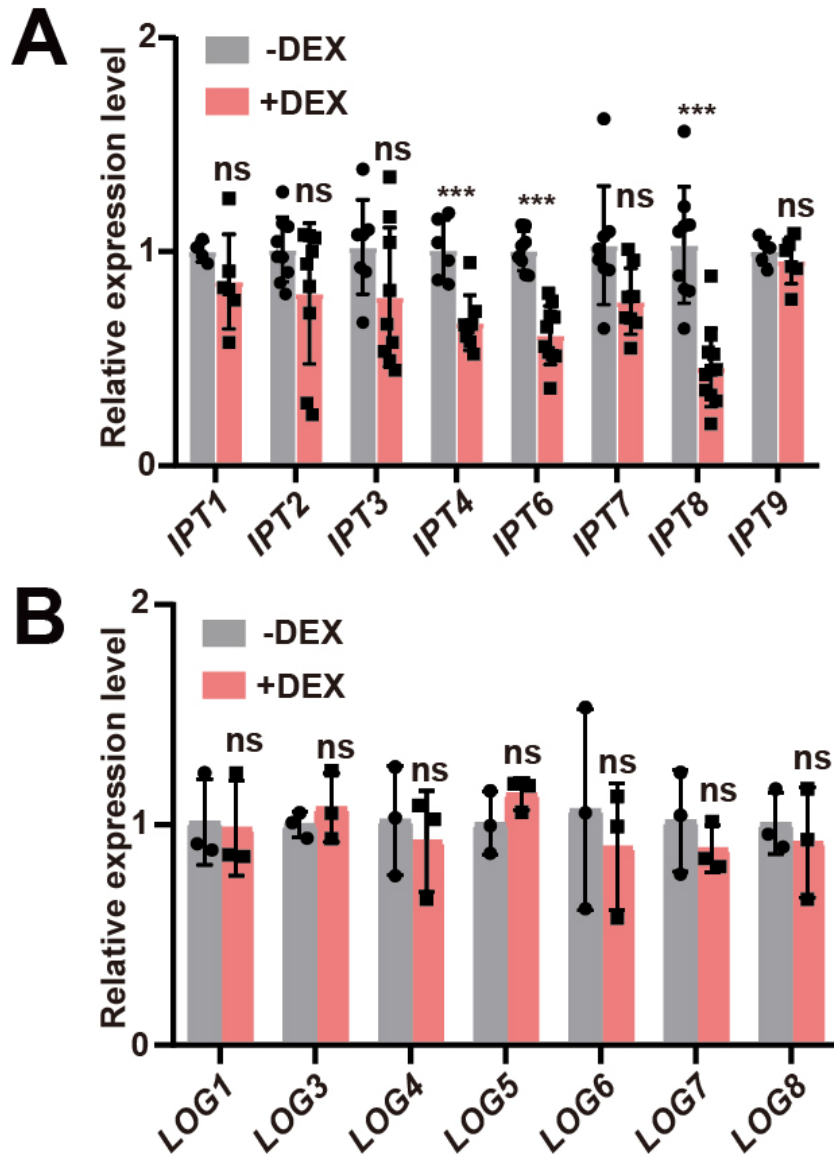

**Fig. S8. The expression levels of IPTs and LOGs in *UBQ10::DRNL-GR* plants with DEX induction.** Expression levels of IPTs (A) and LOGs (B) in the inflorescences of *UBQ10::DRNL-GR* transgenic plants with or without DEX induction in the presence of cycloheximide were measured by qRT-PCR. The data are shown as the mean  $\pm$  s.d. ;  $n \geq 3$  biological replicates, two-tailed Student's *t* tests, \*\*\* $P < 0.001$ ; ns, no significant difference.

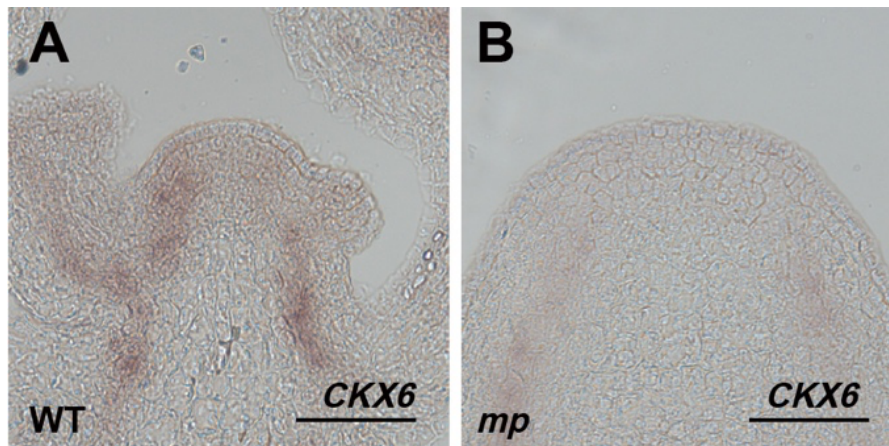

**Fig. S9.** The expression patterns of *CKX6* in the wild type and *mp* mutant. *CKX6* expression patterns in the SAM of WT (A) and *mp* (B) were detected by RNA *in situ* hybridization;  $n \geq 7$  shoot apices per genotype were observed with similar results. Scale bars, 50  $\mu\text{m}$ .

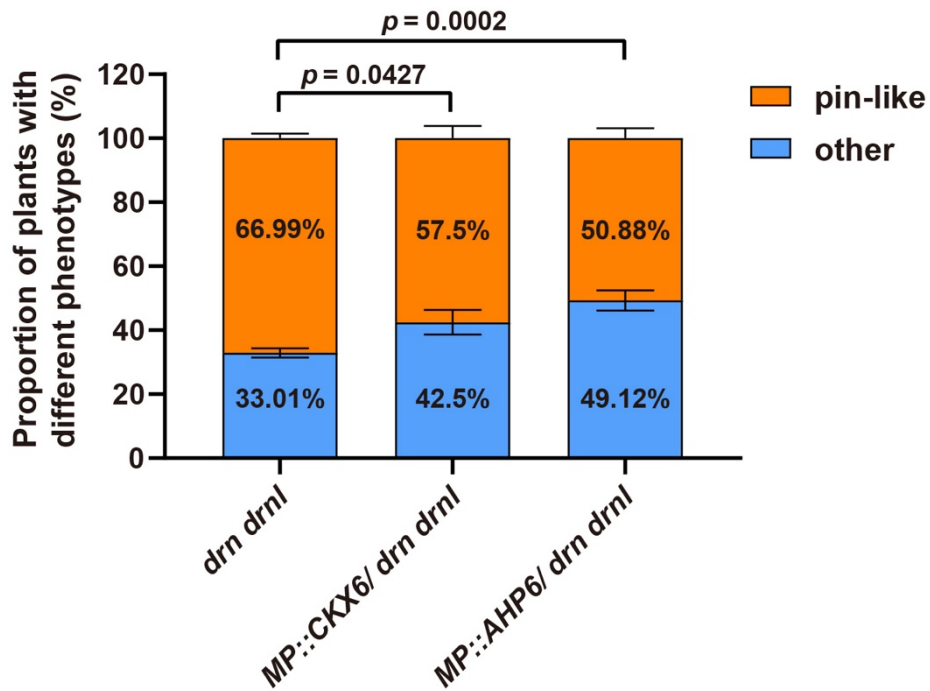

**Fig. S10. Expression of either *AHP6* or *CKX6* partially rescues the organ initiation defects in *drn drnl* mutants.** The proportion of “pin-like” phenotypes in *drn drnl* mutants was partially restored by the expression of *AHP6* or *CKX6* under the control of a 4.1 kb *MP* promoter. *drn drnl*, n = 3 replicates, with each replicate having more than 95 plants. *MP::CKX6/drn drnl*, n = 3 replicates, with each replicate having more than 52 plants. *MP::AHP6/drn drnl*, n = 3 replicates, with each replicate having more than 68 plants. Bars depict SD; Statistics, Chi-square test.

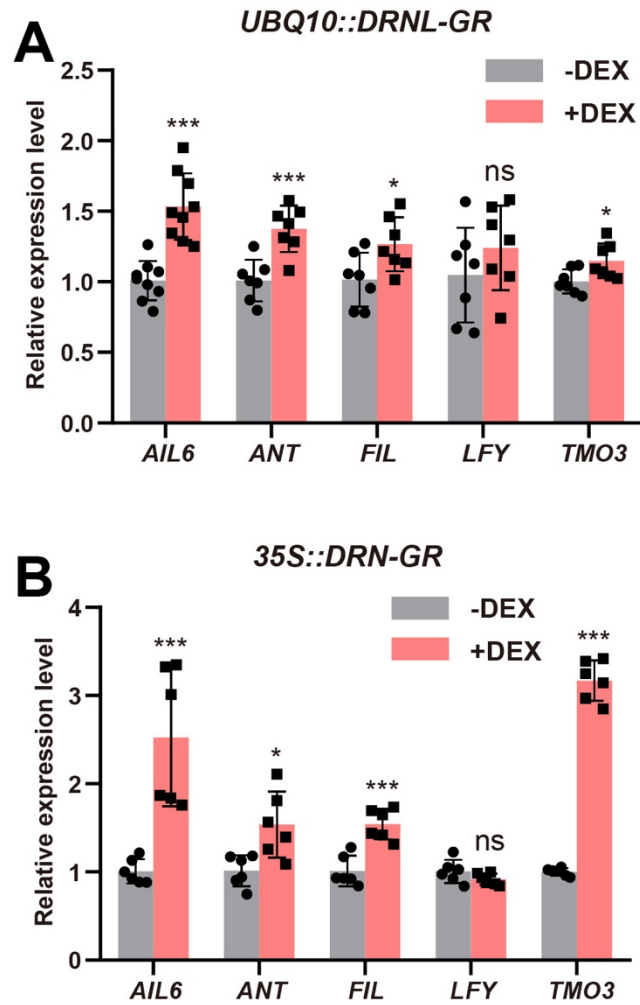

**Fig. S11. DRNL and DRN directly activate the expression of *AIL6*, *ANT*, *FIL* and *TMO3*.**

Detection of *AIL6*, *ANT*, *FIL*, *LFY* and *TMO3* expression levels in the inflorescences of *UBQ10::DRNL-GR* (A) and *35S::DRN-GR* (B) transgenic plants with or without DEX induction in the presence of cycloheximide. The data are shown as the mean  $\pm$  s.d. ;  $n \geq 6$  biological replicates, two-tailed Student's *t* tests, \* $P < 0.05$ , \*\*\* $P < 0.001$ ; ns, no significant difference.

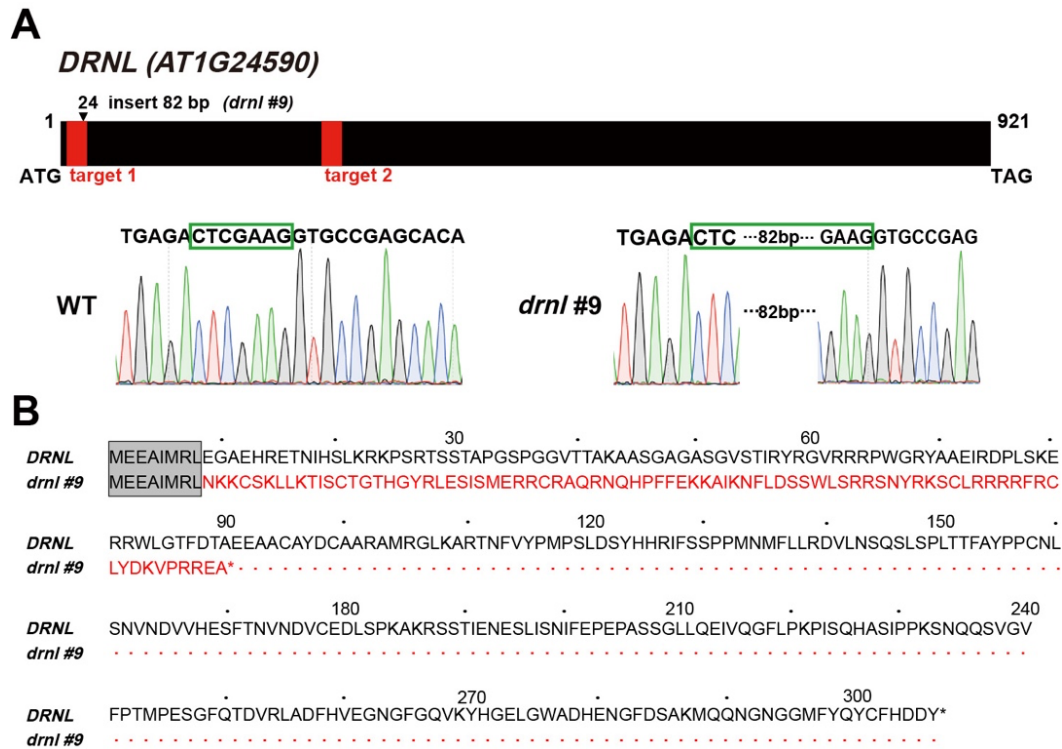

**Fig. S12. Generation of the *drnl* mutant in the Col-0 background.** (A) The *drnl* #9 mutant in the Col-0 background was generated by CRISPR/Cas9 with 82 bp inserted in the first CRISPR/Cas9 target region (upper panel). Arrows indicate the insertion site of 82 bp in *drnl* #9. The two 20-bp sgRNA targets are shown in red. The bottom panel shows the sequencing of the target region in *drnl* #9. (B) Comparison of the translated amino acid sequences of the WT and *drnl* #9.

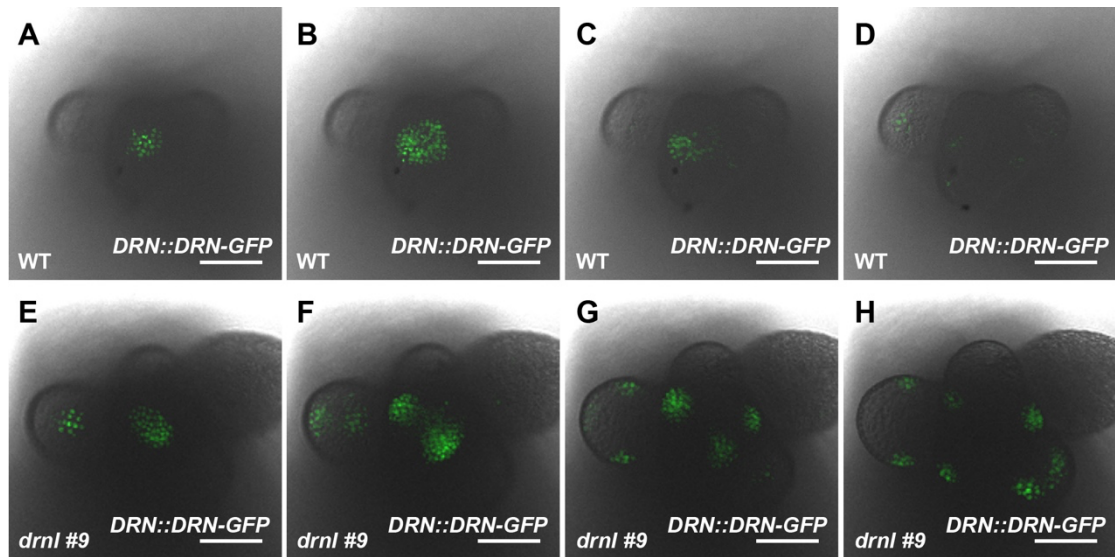

**Fig. S13. DRN protein distribution patterns in the *drnl #9* SAM.** Top view of *DRN::DRN-GFP* in WT Col-0 (A-D) and *drnl #9* mutant (E-H) inflorescences by the serial optical transverse sections imaged using an Olympus FV3000 confocal microscope;  $n \geq 16$  shoot apices per genotype were observed with similar results. Scale bars, 50  $\mu\text{m}$ .

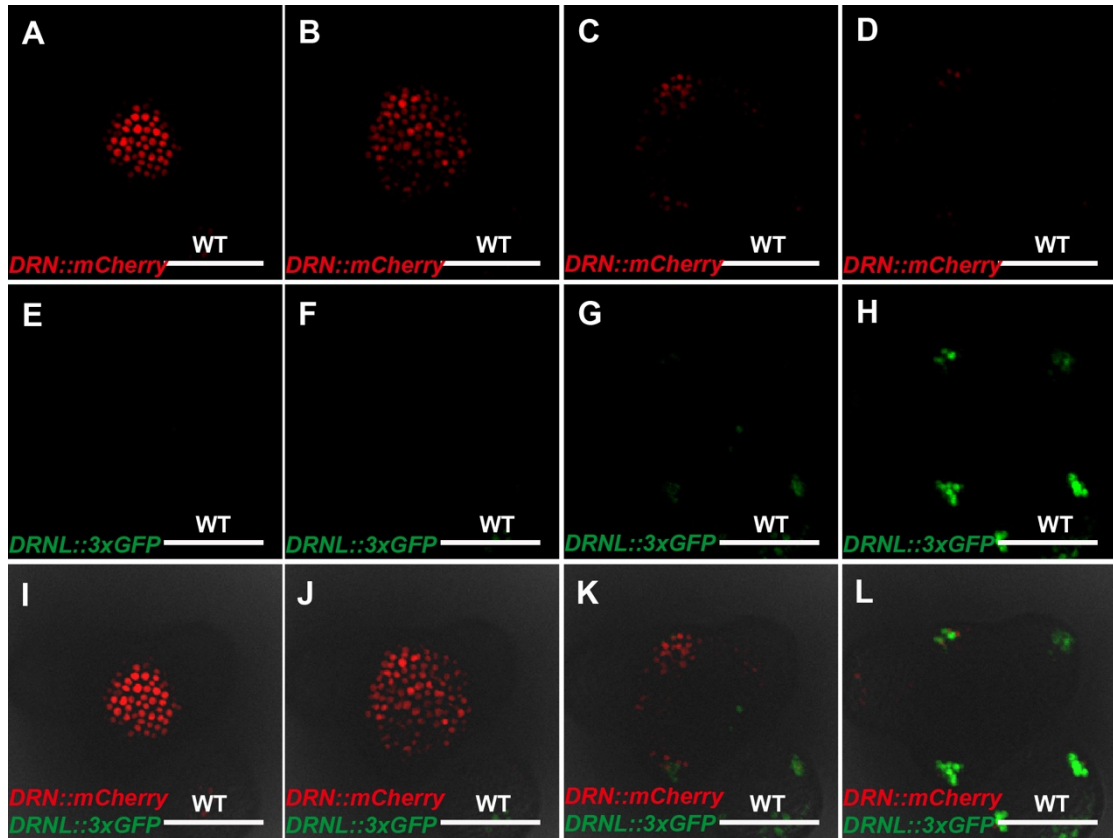

**Fig. S14. Top view of *DRN::mCherry* and *DRNL::3xGFP* in the WT.** Separate images from each channel of Fig. 5 E-H are shown, including *DRN::mCherry* (A-D), *DRNL::3xGFP* (E-H) and merged images (I-L);  $n \geq 20$  shoot apices per genotype were observed with similar results. Scale bars, 50  $\mu\text{m}$ .

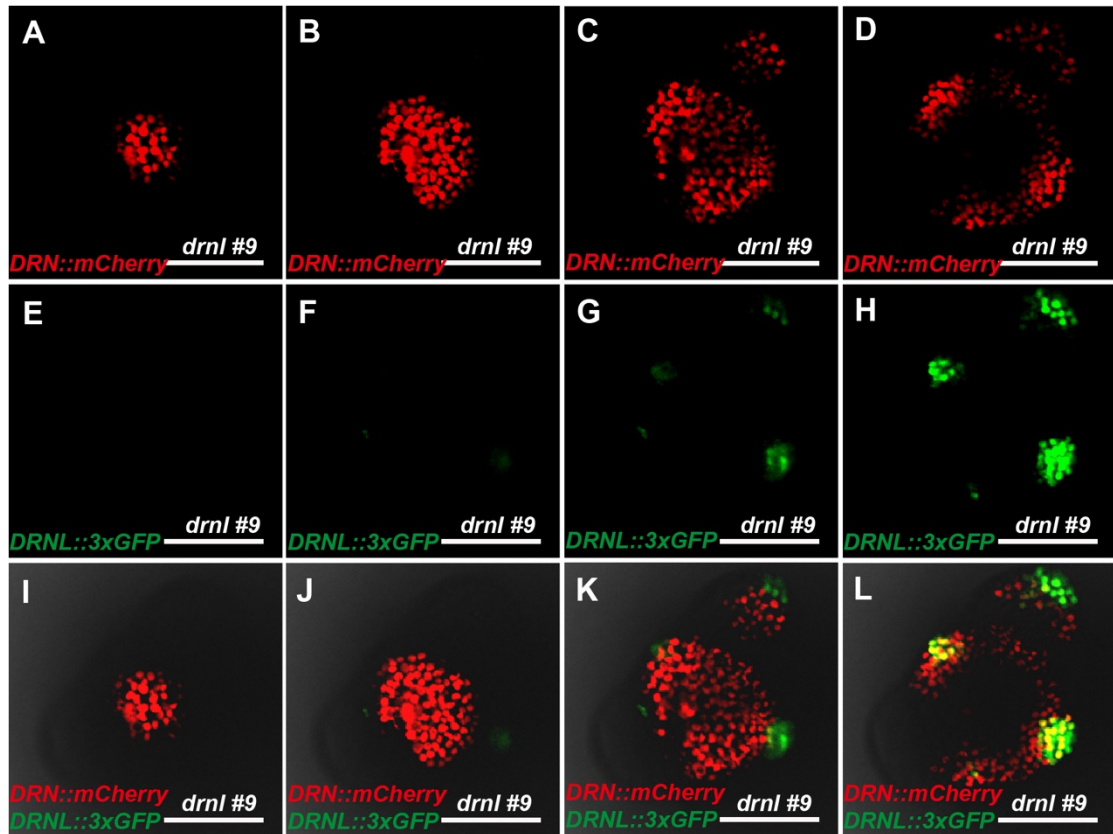

**Fig. S15. Top view of *DRN::mCherry* and *DRNL::3xGFP* in the *drnl #9*.** Separate images from each channel of Fig. 5 I-L are shown, including *DRN::mCherry* (A-D), *DRNL::3xGFP* (E-H) and merged images (I-L);  $n \geq 30$  shoot apices per genotype were observed with similar results. Scale bars, 50  $\mu\text{m}$ .



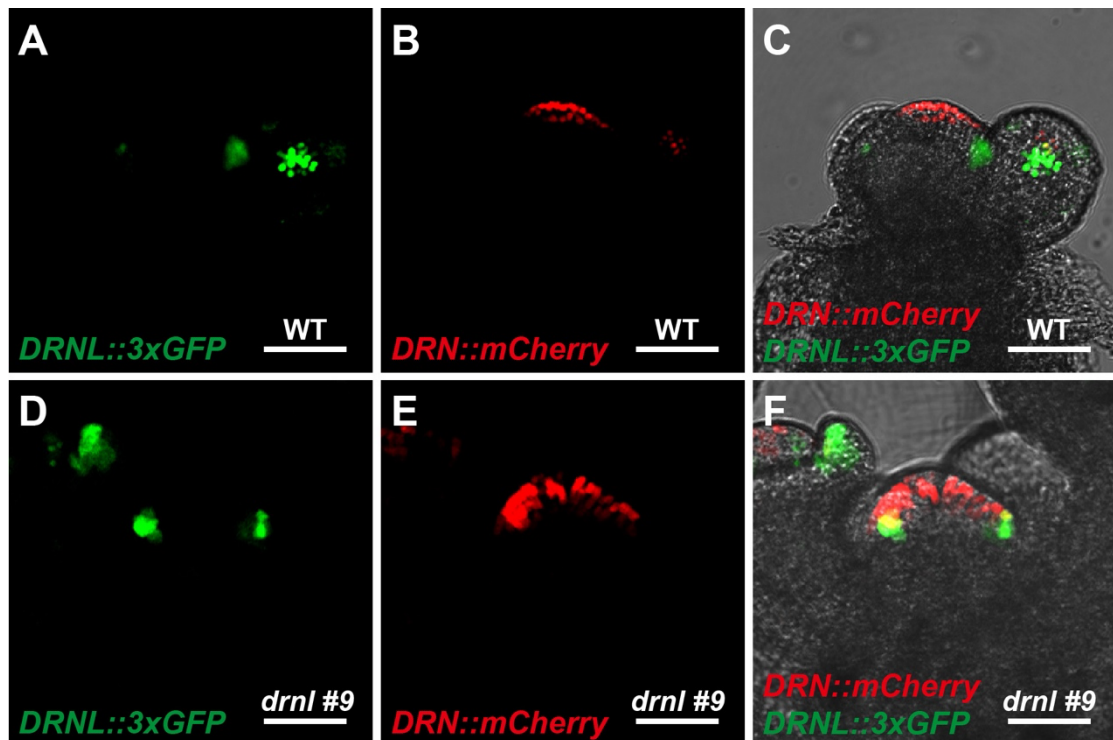

**Fig. S16.** The expression patterns of *DRNL* and *DRN* in the SAM of wild-type and *drnl #9* plants. *DRNL* (A, D) and *DRN* (B, E) expression was detected by *DRNL::3xGFP* and *DRN::mCherry* in the WT (A-C) and *drnl #9* (D-F) apices. (C) Merged images of (A, B). (F) Merged images of (D, E).  $n \geq 12$  shoot apices per genotype were observed with similar results. Scale bars, 50  $\mu\text{m}$ .

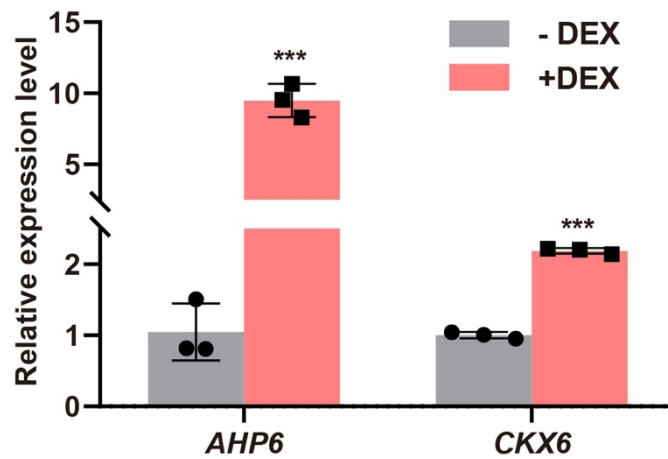

**Fig. S17. DRN directly activates the expression of *AHP6* and *CKX6*.** Detection of *AHP6* and *CKX6* expression levels in the inflorescences of *35S::DRN-GR* transgenic plants with or without DEX induction in the presence of cycloheximide. The data are shown as the mean  $\pm$  s.d. ; n = 3 biological replicates, two-tailed Student's *t* tests, \*\*\*P < 0.001.

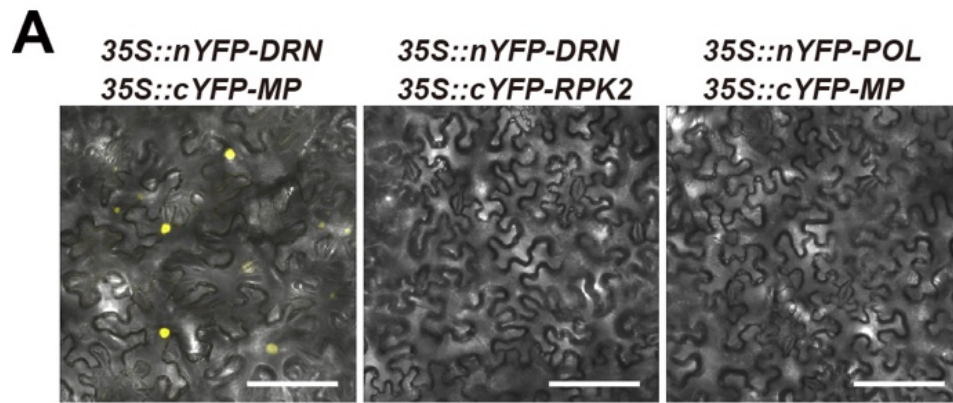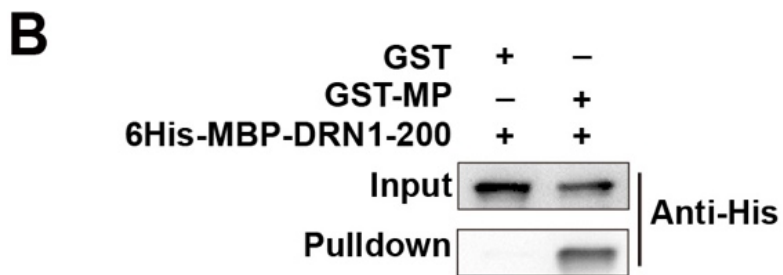

**Fig. S18. DRN interacts with MP *in vivo* and *in vitro*.** (A) BiFC experiments showing that MP interacts with DRN in tobacco leaves. *35S::cYFP-RPK2* and *35S::nYFP-POL* were used as negative controls,  $n \geq 7$  for each of three independent experiments; Scale bars, 50  $\mu\text{m}$ . (B) Pull-down assays show that MP physically interacts with DRN *in vitro*. Two independent experiments were performed with similar results.

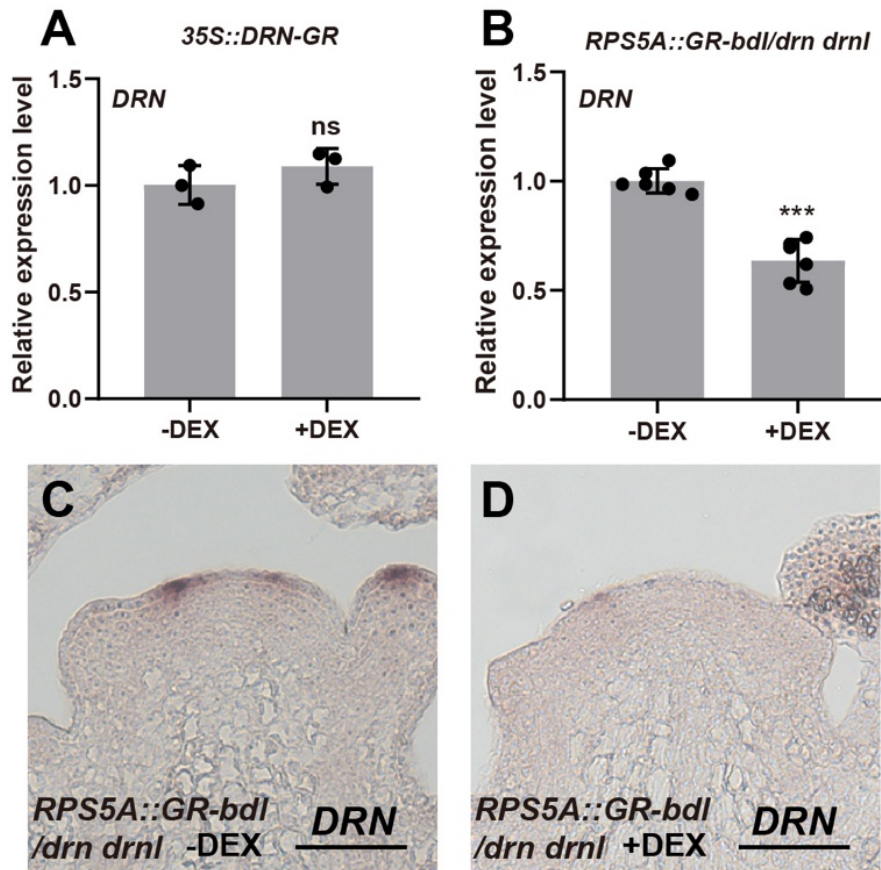

**Fig. S19. DRN transcription in the *drn1* mutant was activated by auxin signaling.** (A) The expression levels of *DRN* in the SAM of *35S::DRN-GR* with or without DEX induction. The data are shown as the mean  $\pm$  s.d. ;  $n = 3$  biological replicates; two-tailed Student's *t* tests, ns, no significant difference. (B) The expression levels of *DRN* in the SAM of *RPS5A::GR-bdl/drn drn1* plants with or without DEX induction. The primers were designed upstream of the inserted *dSpm* element in *drn* plants. The data are shown as the mean  $\pm$  s.d. ;  $n \geq 5$  biological replicates; two-tailed Student's *t* tests, \*\*\* $P < 0.001$ . (C, D) *DRN* expression patterns in the SAM of *RPS5A::GR-bdl/drn drn1* plants with (D) or without (C) DEX induction detected by RNA *in situ* hybridization;  $n \geq 24$  shoot apices for each treatment with similar results. Scale bars, 50  $\mu$ m.

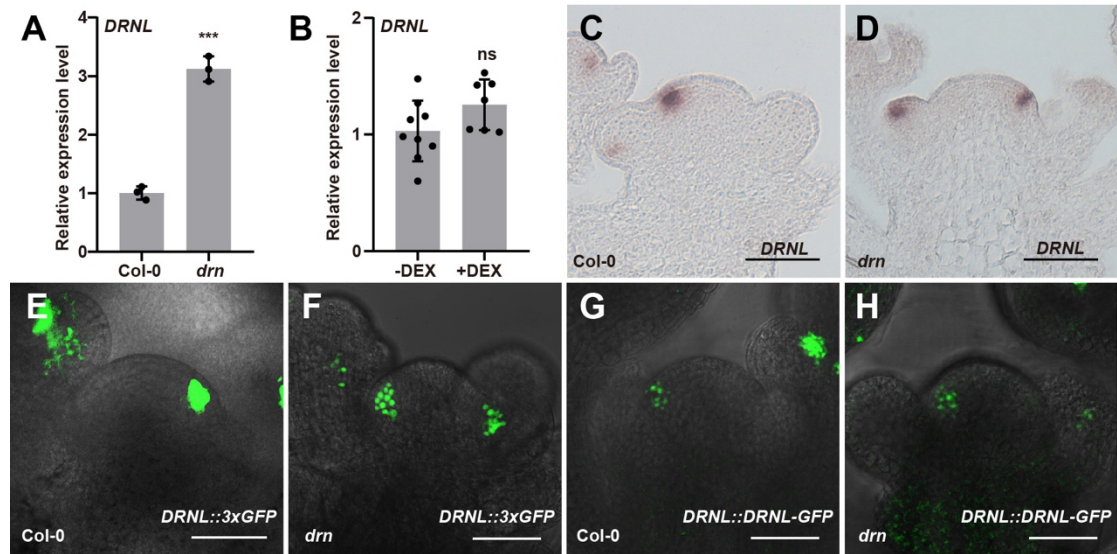

**Fig. S20. DRN regulates *DRNL* expression indirectly in the SAM.** (A and B) Detection of *DRNL* expression levels in the inflorescences of *drn* mutants (A) and *35S::DRN-GR* plants with or without DEX induction in the presence of cycloheximide (B). The data are shown as the mean  $\pm$  s.d. ;  $n \geq 3$  biological replicates, two-tailed Student's *t* tests, \*\*\* $P < 0.001$ ; ns, no significant difference. (C and D) *DRNL* expression patterns in the SAM of Col-0 (C) and *drn* (D) using RNA *in situ* hybridization;  $n \geq 18$  shoot apices per genotype were observed with similar results. Scale bars, 50  $\mu$ m. (E and F) *DRNL* expression patterns in the SAM using *DRNL::3xGFP* transgenic plants in the Col-0 (E) and *drn* (F) backgrounds;  $n \geq 14$  shoot apices per genotype were observed with similar results. Scale bars, 50  $\mu$ m. (G and H) *DRNL* protein distributions in the SAM using *DRNL::DRNL-GFP* transgenic plants in the Col-0 (G) and *drn* (H) backgrounds;  $n \geq 18$  shoot apices per genotype were observed with similar results. Scale bars, 50  $\mu$ m.

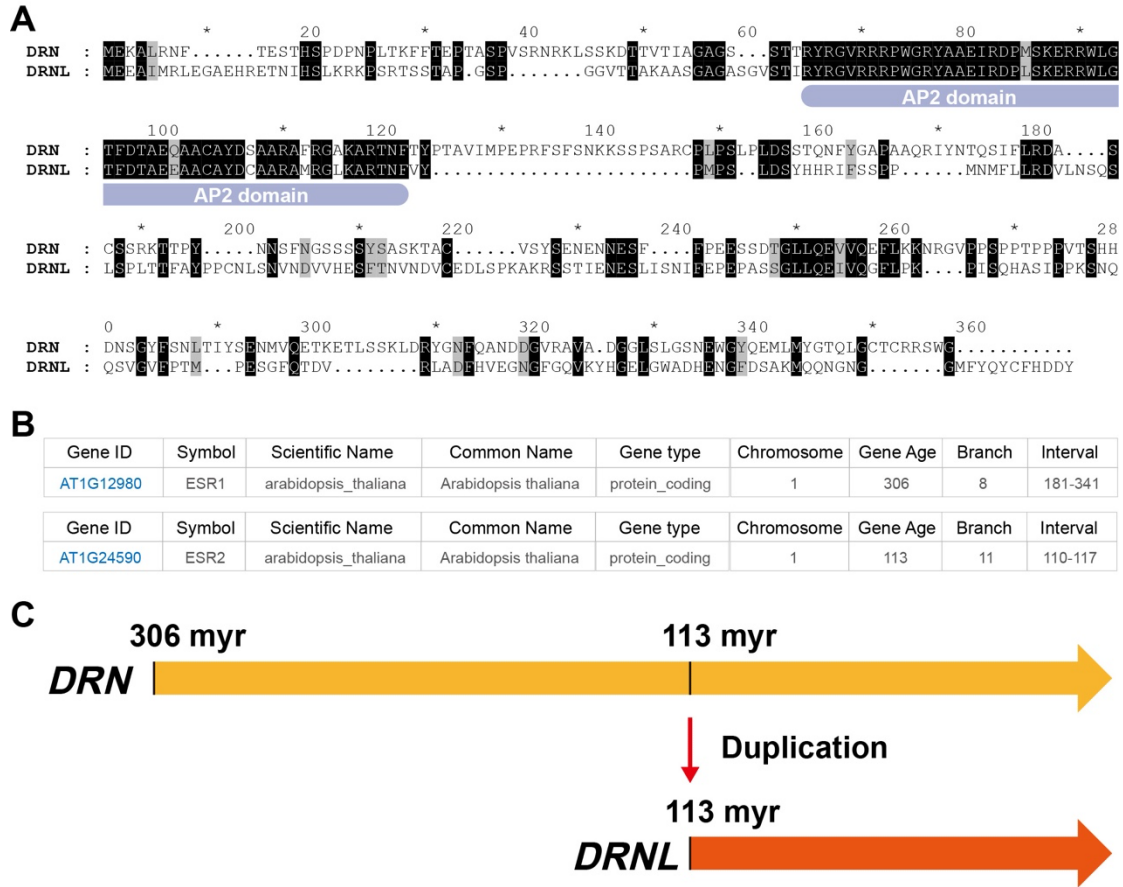

**Fig. S21.** The predicted gene ages of *DRN* and *DRNL*. (A) Schematic comparison of amino acid sequences between *DRN* and *DRNL* with the location of the AP2 domain. (B and C) The gene ages of *DRN* and *DRNL* (C) were predicted by GenOrigin (B) (<http://genorigin.chenzxlab.cn/>).

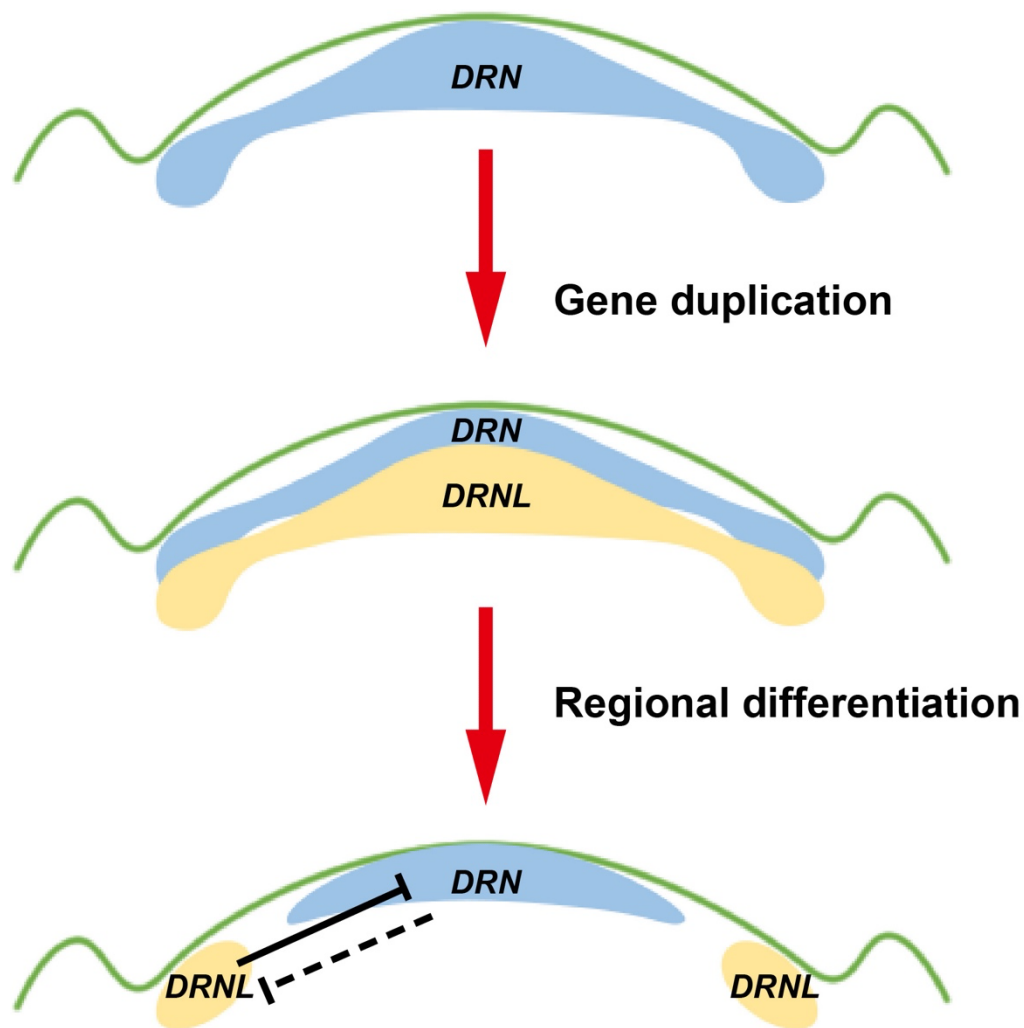

**Fig. S22. Hypothetical evolutionary relationships between *DRN* and *DRNL*.** *DRNL* originated from a gene duplication event from the *DRN* and shows redundant functions immediately following the duplication. During evolution, the expression of *DRN* in organ initiation cells is repressed directly by *DRNL*, which promotes the functional diversity and differentiation of paralogous genes. However, in the case of any disturbance in the *DRNL*, *DRN* is ectopically activated in the primordia and fully restores the functional deficiency to ensure a robust output of auxin during organ initiation.

**Table S1 | Oligonucleotides used in this study (5'→3').**

| Real-time PCR |                            |
|---------------|----------------------------|
| Gene          | Sequence                   |
| <i>IPT1-F</i> | ACGTTAGCGAAGAGACAAGTG      |
| <i>IPT1-R</i> | TCACAATCTTTACGCTTGGCTC     |
| <i>IPT2-F</i> | TGCTTCAGAGATCATCAGGTG      |
| <i>IPT2-R</i> | TTCTGCTTCTTGAACCTTCTCTG    |
| <i>IPT3-F</i> | TTGAGTTAGCTTGTAGGCAGAG     |
| <i>IPT3-R</i> | ACACAGTATCTGTGCTTGGTC      |
| <i>IPT4-F</i> | TCACGAAGATCAACAAGCTGAG     |
| <i>IPT4-R</i> | TCCTGACAATCTTCACACACG      |
| <i>IPT5-F</i> | ACGGAGAGACTTCTTGAAACG      |
| <i>IPT5-R</i> | TGGTCATCGCTGTAACCTAAGG     |
| <i>IPT6-F</i> | AGGAGTTGACCGATACTTTAG      |
| <i>IPT6-R</i> | TCTCCATTCTTTCTTCTCC        |
| <i>IPT7-F</i> | CGTCTAGGCCCTTGTAAGTTGA     |
| <i>IPT7-R</i> | GTCTCGCCATCGACCTAGCA       |
| <i>IPT8-F</i> | TATGACGAAGCTGTCCAAGAG      |
| <i>IPT8-R</i> | TCACCAAGAAGCGTTTCACAAC     |
| <i>IPT9-F</i> | TCGTGCCATTGGGTACAGAC       |
| <i>IPT9-R</i> | TATCTCCACCATCTCTGCTTC      |
| <i>LOG1-F</i> | ATGGAGATAGAATCAAAGTTCAAGA  |
| <i>LOG1-R</i> | TCATCTTGAGATTTCAACAAGTGGGA |
| <i>LOG2-F</i> | ATGGAAGAGACAAAATCAAGATTCA  |
| <i>LOG2-R</i> | CTAAAACGAGTCGCCTTCCAAAGTG  |
| <i>LOG3-F</i> | ATGGAAATCAAAGGTGAATCGATGC  |
| <i>LOG3-R</i> | TCACTCTTCAGAGGAGTAACCAATC  |
| <i>LOG4-F</i> | ATGGAGGTCAACAATGAAACCATGC  |
| <i>LOG4-R</i> | TCAGTCTTCAGAAGAGTAGTCAATC  |



|               |                           |
|---------------|---------------------------|
| <i>LOG5-F</i> | ATGGAAATAGTGAAGTCGAGGTTCA |
| <i>LOG5-R</i> | CTAAAGGGCAATCTCAGTCTGCATG |
| <i>LOG6-F</i> | ATGGAGAATGAAGAGGGAAAAAGAG |
| <i>LOG6-R</i> | CTAACCAGCTTTAGACATAACTTGA |
| <i>LOG7-F</i> | ATGGAAGAGACAAAATCGAGATTCA |
| <i>LOG7-R</i> | GTTTGGTATATACGCGGTTAGCAGT |
| <i>LOG8-F</i> | ATGGAAGATAATCAGCGAAGCAGAT |
| <i>LOG8-R</i> | TTATTGCGGCTTGTTTTCTTGTCCC |
| <i>LOG9-F</i> | CATATCTGGTGAGACTGTTGGAGAG |
| <i>LOG9-R</i> | GGCTTGTTCTCATTTAGTAGTGGGT |
| <i>AHK2-F</i> | GAGCTTTTTGACATCGGG        |
| <i>AHK2-R</i> | TTCTCACTCAACCAGACGAG      |
| <i>AHK3-F</i> | GTGACCAGGCCAAGAACTTA      |
| <i>AHK3-R</i> | CTTCCCTGTCCAAAGCAA        |
| <i>AHK4-F</i> | GGCACTCAACAATCATCAAG      |
| <i>AHK4-R</i> | TCTTTCTCGGCTTTTCTGAC      |
| <i>AHP1-F</i> | TAGGAGCACAGAGAGTTAAGA     |
| <i>AHP1-R</i> | GCACAAAGAAAGAAGTTCAC      |
| <i>AHP2-F</i> | AAAAATCCTCTCCCAATCTCC     |
| <i>AHP2-R</i> | CTTTGTCTTTAACGCCTTGTA     |
| <i>AHP3-F</i> | AGCTGCAAGATGAATGTAGTC     |
| <i>AHP3-R</i> | CACTTGAGGGATTCTACCAC      |
| <i>AHP4-F</i> | TGTTGAAGAAGTTTCCGCATTA    |
| <i>AHP4-R</i> | AAGCATCCTTCCGCATTT        |
| <i>AHP5-F</i> | CAGGTGGATTCAGGTGTTCA      |
| <i>AHP5-R</i> | ATTTTTCACCTCCTTGCAC       |
| <i>AHP6-F</i> | CCGCAACCTTAGATTATTGTTGAT  |
| <i>AHP6-R</i> | CCCTACGAGCACCAATGC        |
| <i>ARR1-F</i> | TGGCTACGGATACAGCAACAATG   |

|                |                           |
|----------------|---------------------------|
| <i>ARR1-R</i>  | ATGTTATCGATGGAGTATGCGTC   |
| <i>ARR2-F</i>  | TCAGGACGCAGCAACTGCAAC     |
| <i>ARR2-R</i>  | TGGAGGACAAGTCACTGTCTC     |
| <i>ARR3-F</i>  | TCTCAGCCACATCCTCGATGG     |
| <i>ARR3-R</i>  | TCCACAAGCGAAGTTGCAGAC     |
| <i>ARR4-F</i>  | TGGAGATCTTTTCCACCTCGC     |
| <i>ARR4-R</i>  | TCATCTTCTGCCGTCTGAATCG    |
| <i>ARR5-F</i>  | AGCTCAAAGATTCACACACATGC   |
| <i>ARR5-R</i>  | TCTCCTCTCTAATGAATCCAAGTC  |
| <i>ARR6-F</i>  | TCCGATGCAAATTCCGTGACTG    |
| <i>ARR6-R</i>  | AACCCACTGAATTCAATCAGCG    |
| <i>ARR7-F</i>  | TGAGGTCATGAGGATGGAGATTC   |
| <i>ARR7-R</i>  | CAAGATACTGCAAAGCCCTAGTTC  |
| <i>ARR8-F</i>  | TCGGTCTGAAGGAGGACTAACG    |
| <i>ARR8-R</i>  | TGCAGTCCGTTGTTGTTGCTTC    |
| <i>ARR9-F</i>  | AATGGAGTCCCCACTGCAGTAG    |
| <i>ARR9-R</i>  | TTGTTGATACTCAATGTTTGCTCCT |
| <i>ARR10-F</i> | TGCGTTCTGCGACTCAGCTAG     |
| <i>ARR10-R</i> | TGAGTTGTTTGCAGGCTGCTG     |
| <i>ARR11-F</i> | TCTCCAGCAACAACCATTGCCAAG  |
| <i>ARR11-R</i> | TCTGTGTTGAACTCCTGCAGC     |
| <i>ARR12-F</i> | ACTCCACGATGAAGCAGGTGTG    |
| <i>ARR12-R</i> | TCTCTCATATGCATGTTCTGAGTG  |
| <i>ARR13-F</i> | ATGCAACTACACAGCCAAATCTTG  |
| <i>ARR13-R</i> | TGTTACGAAGGTCCAGTCACC     |
| <i>ARR14-F</i> | TTCATGGTCTATCTTCCTCAGC    |
| <i>ARR14-R</i> | ACAGTTGCAGAGCCTTCTCTTC    |
| <i>ARR15-F</i> | TCAGCACTCAGAGAAATCCCA     |
| <i>ARR15-R</i> | TTCTTCTTCAGCTTCACCA       |

|                |                         |
|----------------|-------------------------|
| <i>ARR16-F</i> | ATGAACAGTTCAGGAGGTTCTTG |
| <i>ARR16-R</i> | TGCAACAAGAGATCTTGAGCAAC |
| <i>ARR17-F</i> | AAGGGCTGTGGAAGTGGAAAG   |
| <i>ARR17-R</i> | GCCCGTTTTCTGCAGTTGTC    |
| <i>ARR18-F</i> | TGAGATGATGAAACAGGAGGAG  |
| <i>ARR18-R</i> | TGCAACTGGTAGAGAAAGAG    |
| <i>ARR19-F</i> | ACCAGATCATAACCAATCCTCCG |
| <i>ARR19-R</i> | AGAGGCTTGAAGAAGTTCTTC   |
| <i>ARR20-F</i> | AGATGTCACTCTTGCAGCCTC   |
| <i>ARR20-R</i> | ACGTGTCTAGATTCTTGCTTGG  |
| <i>ARR21-F</i> | TGGATCTGGATCAAACCTGACGC |
| <i>ARR21-R</i> | TGTCCAAACCCAAGAACTTGAG  |
| <i>ARR22-F</i> | TCTTGATGCAATGCCTACCTTC  |
| <i>ARR22-R</i> | TCTTCACTTCTATCGACTTGG   |
| <i>CKX1-F</i>  | AGCTTCGACGATGTCCACAA    |
| <i>CKX1-R</i>  | GTCCTTGAAGCGAGTGACCA    |
| <i>CKX2-F</i>  | GGCCAAGGCCACTCCTTAAA    |
| <i>CKX2-R</i>  | CCTTTCTCCGCCGTCTTCTT    |
| <i>CKX3-F</i>  | GACGAAACTTCTCAATACAC    |
| <i>CKX3-R</i>  | GTTGCGATTCATAGGATA      |
| <i>CKX4-F</i>  | ATAAAGGCTCAACCAGCCCC    |
| <i>CKX4-R</i>  | ACGTCATGTTACGACGACA     |
| <i>CKX5-F</i>  | CGCATCGGAGCCATAGATGT    |
| <i>CKX5-R</i>  | TCGGCCGATGATGGATGAAG    |
| <i>CKX6-F</i>  | ATGTGTCTGGTGGTGAGCTG    |
| <i>CKX6-R</i>  | GGCCGCTTATTCCAGCATTG    |
| <i>CKX7-F</i>  | GTTTGTCAACGGTGCTGACC    |
| <i>CKX7-R</i>  | GAAGACCGAGTTCGAGGCAA    |
| <i>DRNL-F</i>  | CGTTTAGCTGACTTCCATGTC   |

|                                                   |                            |
|---------------------------------------------------|----------------------------|
| <i>DRNL-R</i>                                     | CCGTTCTGCTGCATCTTAGC       |
| <i>DRN-F</i>                                      | TGTACGGAACTCAGTTAGGC       |
| <i>DRN-R</i>                                      | ACATTGGGAAAGGTAGCAAC       |
| <i>AHP6-F</i>                                     | CCGCAACCTTAGATTATTGTTGAT   |
| <i>AHP6-R</i>                                     | CCCTACGAGCACCAATGC         |
| <i>AIL6-F</i>                                     | AGCAGCAGCAGCAACAGAACTT     |
| <i>AIL6-R</i>                                     | AGAGGAAGAACTCAGCCGGATTT    |
| <i>ANT-F</i>                                      | AGATCCCAACGGATTCAAACAGC    |
| <i>ANT-R</i>                                      | CTTTAGGAGGATATAGGAGAGGG    |
| <i>FIL-F</i>                                      | CAGCAACCCAACAATCAAGAAG     |
| <i>FIL-R</i>                                      | GATTGATTGATGGGTATTTGAC     |
| <i>LFY-F</i>                                      | ATGGATCCTGAAGGTTTCACGA     |
| <i>LFY-R</i>                                      | CTCTAAACCACCAAGTCGCAT      |
| <i>TMO3-F</i>                                     | CCGAGGAGTGAGACAGCGTCC      |
| <i>TMO3-R</i>                                     | GCTTCTTCCGCCGTGTTGTAAGTACC |
| <i>DRN-F</i> (3'UTR)                              | GTACGGAACTCAGTTAGGCT       |
| <i>DRN-R</i> (3'UTR)                              | CCAACATTGGGAAAGGTAGC       |
| <i>DRN-F</i> (Upstream of<br><i>dSpm</i> element) | ATGGAAAAAGCCTTGAGAAAC      |
| <i>DRN-R</i> (Upstream of<br><i>dSpm</i> element) | TTTGAAGACAGTTTGCGGTTG      |

### ***in situ* hybridization**

| <b>Gene</b>   | <b>Sequence</b>                                  |
|---------------|--------------------------------------------------|
| <i>AHP6-F</i> | ATGTTGGGGTTGGGTGTGGAC                            |
| <i>AHP6-R</i> | GTAATACGACTCACTATAGGGCGACATTGGATATCTGAC<br>TCCTG |
| <i>CKX6-F</i> | GAGCTATCTACATGCAAGCC                             |

|                                                   |                                                  |
|---------------------------------------------------|--------------------------------------------------|
| <i>CKX6-R</i>                                     | AATTAACCCTCACTAAAGGGACATGGTTGGTGTCTGGTTC<br>CA   |
| <i>DRN-F</i>                                      | ATGGAAAAAGCCTTGAGAAAC                            |
| <i>DRN-R</i>                                      | GTAATACGACTCACTATAGGGCGCTATCCCCACGATCTT<br>CGGC  |
| <i>DRNL-F</i>                                     | ATGGAAGAAGCAATCATGAGA                            |
| <i>DRNL-R</i>                                     | GTAATACGACTCACTATAGGGCGCTAATAATCATCATGAA<br>AGC  |
| <i>MP-F</i>                                       | TATCCGAACCTTCCATCTCAG                            |
| <i>MP-R</i>                                       | GTAATACGACTCACTATAGGGCGGCGACAATATCCTTAT<br>GCACC |
| <i>DRN-F</i> (Upstream of<br><i>dSpm</i> element) | ATGGAAAAAGCCTTGAGAAACTTCACCGAATCTACCCAC<br>T     |
| <i>DRN-F</i> (Upstream of<br><i>dSpm</i> element) | GTAATACGACTCACTATAGGGCGTGTCTCCACGAAAGGCA<br>CGA  |

### Plasmid construction

|                        |                                 |
|------------------------|---------------------------------|
| <i>DRNL</i> promoter-F | TCGTATCCAAGGTTGAATGTTGG         |
| <i>DRNL</i> promoter-R | GGTTGACCTAAGGGAAATTTTTTA        |
| <i>MP</i> promoter-F   | TAGAGAGAGGACGTGTGTGA            |
| <i>MP</i> promoter-R   | CATCATACAGAGAGATTTTT            |
| <i>P16</i> promoter-F  | ACGCGTCGACTGGAACCATCTTTTGGGTTTC |
| <i>P16</i> promoter-R  | CCGGAATTCCCACGCCGTCGTAGATGAGA   |
| <i>DRNL</i> CDS-F      | ATGGAAGAAGCAATCATGAG            |
| <i>DRNL</i> CDS-R      | ATAATCATCATGAAAGCAAT            |
| <i>DRN</i> CDS-F       | ATGGAAAAAGCCTTGAGAAA            |
| <i>DRN</i> CDS-R       | CTATCCCCACGATCTTCGGC            |
| <i>MP</i> CDS-F        | ATGATGGCTTCATTGTCTTG            |
| <i>MP</i> CDS-R        | TTATGAAACAGAAGTCTTAA            |

*AHP6* genome sequence-  
F ATGTTGGGGTTGGGTGTGGA

---

*AHP6* genome sequence-  
R TTACATTGGATATCTGACTC

---

*CKX6* genome sequence-  
F ATGAGCTATCTACATGCAAG

---

*CKX6* genome sequence-  
R TCATGAGTATGAGACTGCCT

---

*POL* CDS-F ATGGGAAACGGGACTTCCCGTG

---

*POL* CDS-R TTATCTATTGAATTTTTG

---

*RPK2* CDS-F ATGACTTCTTTGCCTTCT

---

*RPK2* CDS-R CTAACACGACGGAGGTTG

---

### CRISPR-Cas9

*DRNL*-CRISPER-DT1-BsF ATATATGGTCTCGATTGAAGCAATCATGAGACTCGAGTT

---

*DRNL*-CRISPER-DT1-F0 TGAAGCAATCATGAGACTCGAGTTTTAGAGCTAGAAATA  
GC

---

*DRNL*-CRISPER-DT2-R0 AACCATGGCCTACGCCTCAGCCAATCTCTTAGTCGACT  
CTAC

---

*DRNL*-CRISPER-DT2-  
BsR ATTATTGGTCTCGAAACCATGGCCTACGCCTCAGCC

---

### ChIP

*AHP6* S1-F TGAATAGGGTACTCGAGCAC

---

*AHP6* S1-R ACGGAACAAACAAGTAGCTAG

---

*AHP6* S2-F TATACTTTCTGGTCCAGGAG

---

*AHP6* S2-R TACCAACACCTCTGGTTACGTG

---

*AHP6* S3-F ACGTAACCAGAGGTGTTGGTAC

---

*AHP6* S3-R AAGGCCTTTCTCTTTCTCGATC

|                  |                             |
|------------------|-----------------------------|
| <i>AHP6 S4-F</i> | ACCAGCTGGTCTGACAGGGTAC      |
| <i>AHP6 S4-R</i> | ACATGAGATGAGGTGACCCAC       |
| <i>AHP6 S5-F</i> | TGTGGGTCACCTCATCTCATG       |
| <i>AHP6 S5-R</i> | CCACAACGGCACACCCGTCTTG      |
| <i>CKX6 S1-F</i> | TCTGTTATCCACCTGCCCCGA       |
| <i>CKX6 S1-R</i> | TCCCATTGCAGCTAGCTGAC        |
| <i>CKX6 S2-F</i> | GTGGGTGTAAGTGTATC           |
| <i>CKX6 S2-R</i> | TATAGTTGAGGCCTCTCCCT        |
| <i>CKX6 S3-F</i> | TGGTTGCCTCGGCCATTTCAG       |
| <i>CKX6 S3-R</i> | GCTCATAAGGCCTCTTGATTTCT     |
| <i>CKX6 S4-F</i> | TGAACATGTCCATCACGCCT        |
| <i>CKX6 S4-R</i> | TTGAGGCGATGTCGCTTACC        |
| <i>CKX6 S5-F</i> | TCTAACCAACATGCGAGAGTGA      |
| <i>CKX6 S5-R</i> | ACCACACAAATGAGCAGCAG        |
| <i>DRN S1-F</i>  | AACGCAGGGGTTTTAATTGC        |
| <i>DRN S1-R</i>  | CTGGAGTATCTTTCAAAGC         |
| <i>DRN S2-F</i>  | AAACGTAAGCATCGGGCGAT        |
| <i>DRN S2-R</i>  | GGAACAAAAGATATGCATAGC       |
| <i>DRN S3-F</i>  | CTTCTCGATATCACCGAT          |
| <i>DRN S3-R</i>  | CGACCAACAGTCATTTTC          |
| <i>DRN S4-F</i>  | AGCAATAAGAACGTGGT           |
| <i>DRN S4-R</i>  | GGAAACTTTTGAGTTGCAC         |
| <i>DRN S5-F</i>  | GTGCAACTCAAAGTTTCC          |
| <i>DRN S5-R</i>  | CCATTTTTGGTTTCTAGGG         |
| <i>DRN S6-F</i>  | ATGGAAAAAGCCTTGAGAACTTCACCG |
| <i>DRN S6-R</i>  | TGCCAGCTCCGGCGATGGTTA       |

## EMSA

|                                            |                                                             |
|--------------------------------------------|-------------------------------------------------------------|
| <i>AHP6-F</i>                              | GCAGAGTCACGCGGGGTAACCGGCTGGCGGCTGTAGCC<br>GGTCACAGAGTGATTA  |
| <i>AHP6-R</i>                              | TTAATACTCTGTGACCGGCTACAGCCGCCAGCCGGTT<br>ACCCCGCGTGACTCTGC  |
| <i>AHP6-mutant probe-F</i>                 | GCAGAGTCACGCGGGGTAACCGGCTGGAGGATGTAGCC<br>GGTCACAGAGTGATTA  |
| <i>AHP6-mutant probe-R</i>                 | TTAATACTCTGTGACCGGCTACATCCTCCAGCCGGTT<br>ACCCCGCGTGACTCTGC  |
| <i>CKX6-for DRNL binding-F</i>             | GAAATCGATACCAGTTGATCCCTTTGGCGGTCTTACATC<br>CCAAATCGGTAAGCGA |
| <i>CKX6-for DRNL binding-R</i>             | TCGCTTACCGATTTGGGATGTAAGACCGCCAAAGGGATC<br>AACTGGTATCGATTTT |
| <i>CKX6-probe1-for MP binding-F</i>        | ATATAAAGCTAATCTTTTATCATAATGTCTGATCAAAGAA<br>TTTAAGAAAAGAA   |
| <i>CKX6-probe1-for MP binding-R</i>        | TTCTTTTCTTAAATTCTTTTGATCAGACATTATGATAAAAG<br>ATTAGCTTTATAT  |
| <i>CKX6-probe2-for MP binding-F</i>        | AAAGAAGAGATGATTCATTTAGTTTTGTCAGCTAGCTGCA<br>ATGGGAGGCCTTAA  |
| <i>CKX6-probe2-for MP binding-R</i>        | TTAAGGCCTCCCATTGCAGCTAGCTGACAAAATAAATG<br>AATCATCTCTTCTTT   |
| <i>CKX6-probe3-for MP binding-F</i>        | AAGTAAAAGTGTTATGGTATGATCTTGTCTGCCTTTTCTTT<br>GAAAAAGCCAAGA  |
| <i>CKX6-probe3-for MP binding-R</i>        | TCTTGGCTTTTTCAAAGAAAAGGCAGACAAGATCATACCA<br>TAACACTTTTACTT  |
| <i>CKX6-mutant probe1-for MP binding-F</i> | ATATAAAGCTAATCTTTTATCATAATGGCTGATCAAAGAA<br>TTTAAGAAAAGAA   |
| <i>CKX6-mutant probe1-for MP binding-R</i> | TTCTTTTCTTAAATTCTTTTGATCAGCCATTATGATAAAAG<br>ATTAGCTTTATAT  |



|                                |                                                 |
|--------------------------------|-------------------------------------------------|
| <i>CKX6</i> -mutant probe2-for | AAAGAAGAGATGATTCATTTAGTTTTGGCAGCTAGCTGCA        |
| MP binding-F                   | ATGGGAGGCCTTAA                                  |
| <i>CKX6</i> -mutant probe2-for | TTAAGGCCTCCCATTGCAGCTAGCTGCCAAAATAAATG          |
| MP binding-R                   | AATCATCTCTTCTTT                                 |
| <i>CKX6</i> -mutant probe3-for | AAGTAAAAGTGTTATGGTATGATCTTGGCTGCCTTTTCTT        |
| MP binding-F                   | TGAAAAAGCCAAGA                                  |
| <i>CKX6</i> -mutant probe3-for | TCTTGGCTTTTTCAAAGAAAAGGCAGCCAAGATCATACCA        |
| MP binding-R                   | TAACACTTTTACTT                                  |
| <i>DRN</i> -F                  | AGAAAAGCATTTATACTCTTCGCCATATATTTCAAACCTCA<br>CA |
| <i>DRN</i> -R                  | TGTGAAGTTTGAAATATATGGCGAAGAGTATAAATGCTTT<br>TCT |
